# Supplementary material for: Drop impact on thin powder layers: pattern formation by air entrapment
Source: Royal Society of Chemistry journal article supplement (doi:10.1039/c9sm01887e), 2020-01-01
Supplement: c9sm01887e1.pdf [file c9sm01887e1.pdf]

### Description for the Supplementary Video

An ethanol drop of volume 3 micro-liter impinging on the soot layer from a height of 80 cm. Upon impact, the drop quickly spreads. The contraction of the large air-disc is seen at the center. Several micro-bubbles can also be seen flowing into the bulk of the drop. Recording frame rate: 25000 frames per second; Video playing at 25 frames per second.
